# Supplementary material
Source: Springer Nature journal article supplement (https://www.springermedizin.de/resource/supplementary/12876_2009_388_MOESM6_ESM.pdf/9439306)
Supplement: MOESM6 [file 9439306]

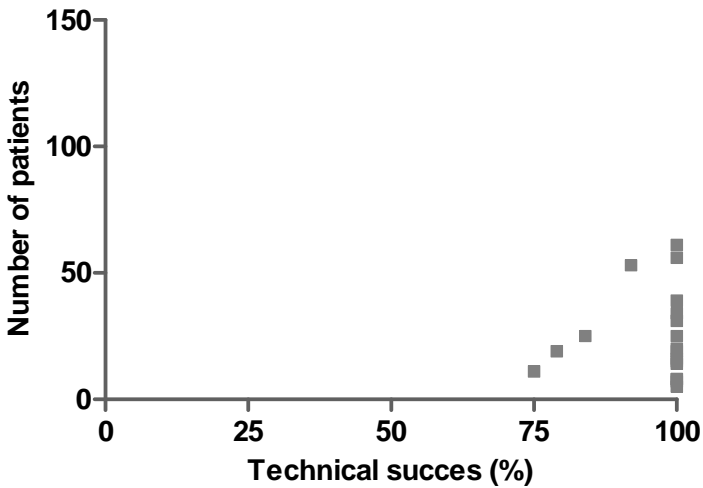

a. Mann-Whitney U-test:  $p = 0.303$   
 Spearman's rank correlation test:  $r = -0.046, p = 0.853$

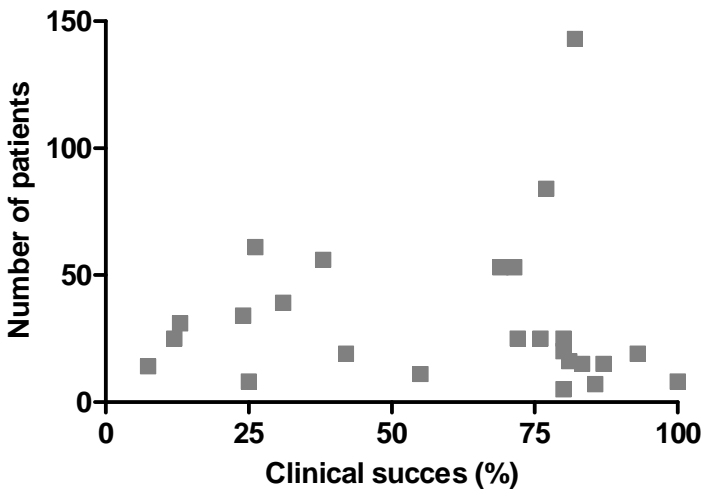

b. Mann-Whitney U-test:  $p = 0.065$   
 Spearman's rank correlation test:  $r = -0.343, p = 0.109$
